# Supplementary material for: AflSte20 Regulates Morphogenesis, Stress Response, and Aflatoxin Biosynthesis of Aspergillus flavus
Source: MDPI journal article supplement (doi:10.3390/toxins11120730), 2019-12-13
Supplement: s1 [file s1]

# Supplementary Materials: AflSte20 Regulates Morphogenesis, Stress Response and Aflatoxin Biosynthesis of *Aspergillus flavus*

Ding Li, Ling Qin, Yinchun Wang, Qingchen Xie, Na Li, Shihua Wang and Jun Yuan

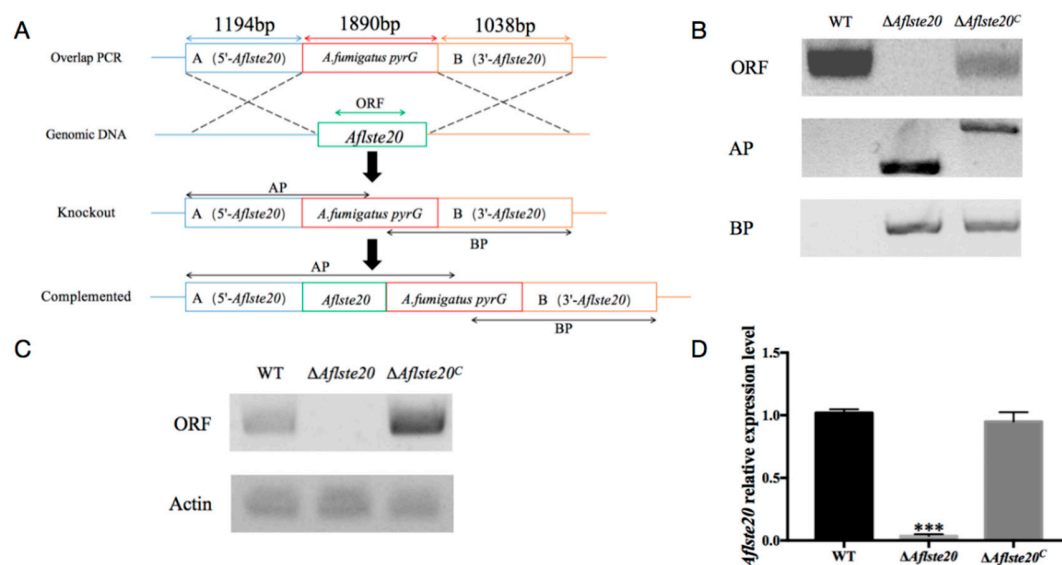

**Figure S1.** Construction strategy and confirmation of the *AflSte20* knock-out and complemented strains. (A) The scheme of *AflSte20* deletion strategy. (B) Confirmation of *AflSte20* mutants by PCR analysis with gDNA as template. (C) Verification of WT,  $\Delta AflSte20$  and  $\Delta AflSte20^C$  strains by RT-PCR analysis with cDNA as template. (D) The expression level of *AflSte20* in WT,  $\Delta AflSte20$  and  $\Delta AflSte20^C$  strains by qRT-PCR. \*\*\* represents significant difference ( $p < 0.001$ ).
